# Supplementary material for: A multimethod approach to assess arbuscular mycorrhizal fungal diversity in a hot arid and hyperalkaline region
Source: Research Square preprint supplement (doi:10.21203/rs.3.rs-4098878/v1), 2024-04-02
Supplement: Supplementary file 2 [file 9c6ef3fcb569330fd020e048.xlsx]

## Sheet: Comparison Table
Taxonomy		Observation				Comparison with litterature
Family	Species	Number of samples	% of mycorrhized individuals	Fréquency (%)	Intensity (%)	% colonization	Estimation method	Reference	Notes
Amaranthaceae	Aerva javanica (Burm.f.) Juss. ex Schult.	1	0	-	-	0.13	Brundrett 1996	El-Zayat. 2007
						44% (frequency)	(infected fragments/total fragments)x100	Santhoshkumar et al. 2018
						not mycorrhized		Sankar et al. 2014 / Muthukumar and Udaiyan 2000
Amaranthaceae	Chenopodiastrum murale (L.) S.Fuentes, Uotila & Borsch	2	50	100	4	not mycorrhized		Koske and Gemma 1990 / Jmal 2015
Amaranthaceae	Haloxylon persicum Bunge	13	38	19.4	17	low mycorrhization after inoculation		Ashgari and Cavagnaro 2010	Considered non mycorrhizal but found lightly mycorrhized after inoculation in greenhouse
Amaranthaceae	Haloxylon salicornicum (Moq.) Bunge ex Boiss.	20	31	34.4	14	10.6% (root length colonization)	gridline intersect method Giovannetti and Mosse 1980	Chaudhry et al. 2005
						42% (max) (root lenght coloniation)	gridline intersect method Giovannetti and Mosse 1980	Chaudhry et al. 2009
Amaranthaceae	Caroxylon imbricatum var. imbricatum	1	0	-	-	Low mycorrhization		O'Connor et al. 2001	No data on Caroxylon imbricatum (Salsola imbricata). Data has been found on Salsola Kali and Salsola baryosma.
						52% (frequency max)	Biermann and Linderman 1981	Marthur et al. 2007	No data on Caroxylon imbricatum (Salsola imbricata). Data has been found on Salsola Kali and Salsola baryosma. Trap culture with endogenic soil.
Amaranthaceae	Soda rosmarinus (Bunge ex Boiss.) Akhani	1	0	-	-	Mycorrhized		Hajiboland 2013
Amaranthaceae	Suaeda vermiculata Forssk. ex J.F.Gmel.	1	0	-	-	Suaeda monoica : 8.3%(frequency)	Brundrett et al. 1996	Abdelmoneim et al. 2014	Among the 4 species of Suaeda found in Saudi Arabia data has only been found on monoica and maritima
						Suaeda maritima : <0.1%	Giovanetti and Mosse 1980	Rozema et al.1986
						Suaeda maritima : mycorrhized		Wang and Qiu 2006
Anacardiaceae	Searsia tripartita (Ucria) Moffett	2	100	-	-	Rhus glutinosa : 91% (root length colonization)	gridline intersect method Giovannetti and Mosse 1980	Birhane et al. 2017	Among the 4 species of Searsia (rhus) found in Saudi Arabia data has only been found on glutinosa and retinorrhoea.
						Rhus glutinosa : 76.3% (root length colonization)	gridline intersect method Giovannetti and Mosse 1980	Birhane et al. 2017
						Rhus glutinosa : 95% (root length colonization)	gridline intersect method Giovannetti and Mosse 1980	Birhane et al. 2017
						Rhus glutinosa : 75.6% (root length colonization)	gridline intersect method Giovannetti and Mosse 1980	Birhane et al. 2017
Apocynaceae	Rhazya stricta Decne.	1	0	-	-	5% (frequency)	Brundrett et al. 1996	Abdelmoneim et al. 2014
						0.7	Philips and Hayman 1970	Yaseen 2020
Arecaceae	Phoenix dactylifera L.	135	23	61	4	85% (frequency)	Trouvelot et al. 1986	Abohatem et al. 2011
						74% (frequency max)	(fragments infected/total fragments)x100	Bouamri et al. 2014
						80% (frequency max) / 60% (intensity max)	frequency : (fragments infected/total fragments)x100 / Intensity : Touvelot et al. 1986	Jaiti et al. 2007
						100% (frequency max) / 43% (intensity max)	frequency : (fragments infected/total fragments)x100 / Intensity : Touvelot et al. 1986	Bouamri et al. 2006
Asclepiadaceae	Pergularia tomentosa L.	1	100	-	-	Pergularia daemia : Not mycorrhized		Muthukumar et Udaiyan 2000	2 species of Pergularia in Saudi Arabia : tomentosa (no data) and daemia
						Pergularia daemia : 68% (frequency)	(infected fragments/total fragments)x100	Santhoshkumar. et al 2018
						Pergularia daemia : 69.63%	intersect method McGonigle et al. 1990	Muthukumar et al. 2006
						Pergularia daemia : 96% (frequency)	(infected fragments/total fragments)x100	Ghosh and Kuila 2015
Asteraceae	Artemisia sp.	1	100	-	-	Artemisia monosperma : 55.7%	Giovanetti and Mosse 1980	Agwa et Al-Sodany. 2003	4 known species in Saudi Arabia. Only data on monosperma and judaica
						Artemisia monosperma : 60%	(infected fragments/total fragments)x100	Moustafa et al. 2010
						Artemisia judaica : 62%	(infected fragments/total fragments)x100	Moustafa et al. 2010
Asteraceae	Picris cyanocarpa Boiss.	1	100	100	93	Picris hieracoides : 80% (root lenght colonization max)	McGonigle et al. 1990	Blanke et al. 2011	No data has been found on the 7 species of Picris found in Saudi Arabia. Data was found on other species of the genus. With inoculation on greenhouse
						Picris sp : 75% (intensity)	Trouvelot et al. 1986	Albaqami et al. 2018	No data has been found on the 7 species of Picris found in Saudi Arabia. Data was found on other species of the genus : hieracioides
						Picris echioides and hieracioides : Mycorrhized		Wang and Qiu 2006	No data has been found on the 7 species of Picris found in Saudi Arabia. Data was found on other species of the genus : hieracioides and echioides
Asteraceae	Sonchus oleraceus L.	4	100	83.25	17	Mycorrhized		Li et al. 2004
Capparaceae	Capparis spinosa L.	1	0	-	-	40 to 60% (frequency max)	Trouvelot et al. 1986	Bouskout et al. 2022	In greenhouse with inoculation, depending on irrigation
Cistaceae	Helianthemum lippii (L.) Dum.Cours.	9	100	81.67	4.5	0.09	Giovanetti and Mosse 1980	Agwa et Al Sodany. 2003
Convolvulaceae	Convolvulus spicatus Peter ex Hallier f.	1	100	-	-	Convolvulus arvensis, alpinus and applegatei : Mycorrhized		Wang and Qiu 2006	Among the 17 species of Convolvulus found in Saudi Arabia data has only been found on arvensis. Data was found on other species of the genus : alpinus and applegatei
						Convolvulus arvensis : 60% (frequency) / medium intensity	No method described	Javaid et al. 1996
						Convolvulus arvensis : 45%(root length colonization)	gridline intersect method Giovannetti and Mosse 1980	Barni and Siniscalco 2000
Cyperaceae	Cyperus conglomeratus Rottb.	1	100	20	0.5	43% (root lenght colonization )	gridline intersect method Giovannetti and Mosse 1980	Shafiq et al. 2006
Fabaceae	Astragalus sieberi DC.	8	100	82	37	Astragalus kahiricus : 52% (frequency)	(infected fragments/total fragments)x100	Moustafa et al. 2010	No data on sieberi nor spinosus. Among the 22 species found in Saudi Arabia, data has only been found on kahiricus. Data was found on other species of the genus : alpinus and applegatei
						Astragalus alpinus : Not mycorrhized		Treu et al. 1996
						Astragalus applegatei : 53%	Gridline intersect method (Giovannetti and Mosse 1980)	Barroetavena et al. 1998	In greenhouse, inoculation with native soil
Fabaceae	Astragalus spinosus (Forssk.) Muschl.	10	70	47.13	6				See Astragalus sieberi above
Fabaceae	Retama raetam (Forssk.) Webb & Berthel.	13	60	30	11	100% (of individuals)/97.78% (max frequency) / 76.26% (intensity max)	frequency : (fragments infected/total fragments)x100 / Intensity : Touvelot et al. 1986	Abdedaiem et al. 2020
						0.453	Giovanetti and Mosse 1980	Agwa et Al-Sodany 2003	Method not specified as Giovannetti and Mosse 1980 present several quantification methods
Fabaceae	Senna italica Mill.	3	66	-	-	85% (frequency)	(infected fragments /total fragments)x100	Al Zain et al. 2020	In greenhouse with inoculation
						6.25 (root lenght colonization) / 0.06 (intensity)	Plenchette and Morel 1996	Sankar et al. 2014
Fabaceae	Vachellia gerrardii (Benth.) P.J.H.Hurter	2	100	-	-	100% (of individuals) / 100% (frequency max) / 25% (Intensity max)	frequency : (fragments infected/total fragments)x100 / Intensity : Touvelot et al. 1986	Suliman et al.2017
Fabaceae	Vachellia tortilis subsp. raddiana (Savi) Kyal. & Boatwr.	2	100	-	-	100% (of individuals) / 50% (frequency max) / 35% (Intensity max)	frequency : (fragments infected/total fragments)x100 / Intensity : Touvelot et al. 1986	Suliman et al.2017
Lamiaceae	Lavandula coronopifolia Poir.	1	0	_	_	Lavandula dentata : 50% (max colonization) / 100% (max frequency / 35% (max intensity)	colonization : gridline intersect method Giovannetti and Mosse 1980 / Fequency and Intensity. Trouvelot 1986	Armada et al. 2016	Among the 5 species of Lavandula found in Saudi Arabia data has only been found on dentata. With inoculation on greenhouse
						Lavandula dentata : 80% (max colonization)	Visual estimation, matrix index	Akachoud et al. 2022
						Lavandula dentata : 61.6% (frequency)	(infected fragments /total fragments)x100	Ouahmane et al. 2006	Among the 5 species of Lavandula found in Saudi Arabia data has only been found on dentata
Lamiaceae	Teucrium leucocladum Boiss.	1	0	-	-	55% (frequency)	(infected fragments /total fragments)x100	Selim et al. 2011
Malvaceae	Malva parviflora L.	1	100	67	12	95% (frequency ) / high intensity	No method described	Javaid et al. 1996
						0.339	(infected fragments /total fragments)x100	Alrajhei et al. 2022
Moraceae	Ficus palmata Forssk.	2	50	-	-	Ficus carica : low mycorrhization	(infected fragments /total fragments)x100	Yaseen et al. 2021	Among the 8 species of Ficus found in Saudi Arabia data has only been found on carica, sycomorus and vasta.
						Ficus sycomorus : 87.6%	gridline intersect method Giovannetti and Mosse 1980	Birhane et al. 2021
						Ficus vasta : 90%	gridline intersect method Giovannetti and Mosse 1980	Birhane et al. 2021
Moraceae	Ficus salicifolia Vahl	1	100	-	-				See Ficus palmata above
Plantaginaceae	Plantago lanceolata L.	1	0	-	-	100% (of individuals)		Eriksen et al. 2002
						32% Hyphal coil / 24% arbuscules	McGonigle et al. 1990	Kasowska 2002
						90% (frequency) / 70% (Intensity)	Trouvelot et al. 1986	Orlowska et al. 2002
						64% (frequency)	gridline intersect method Giovannetti and Mosse 1980	Pawloswska et al. 1997
						not mycorrhized		Sankar et al. 2014
Poaceae	Chloris barbata Sw.	1	100	83	3.5	90% (frequency)	(infected fragments/total fragments)x100	Dutta et al. 2016
						not mycorrhized		Muthukumar and Udaiyan 2000
Poaceae	Polypogon monspeliensis (L.) Desf.	1	100	33	0.5	Mycorrhized		Wang and Qiu 2006
						0.35	magnified intersections method. McGonigle et al. 1990	Jmal et al. 2015
Poaceae	Stipagrostis ciliata (Desf.) De Winter	1	0	-	-	85% (frequency max)	gridline intersect method Giovannetti and Mosse 1980	Uhlman et al. 2004
Poaceae	Stipagrostis plumosa (L.) Munro ex T.Anderson	2	0	-	-	0.07	Method not described	Taheri et al. 2009
Polygonaceae	Calligonum comosum L'Hér.	1	0	-	-	65% (frequency)	(infected fragments/total fragments)x100	Chaudhry et al. 2005
Polygonaceae	Rumex vesicarius L.	1	100	100	25	Non mycorrhized		Albaqami et al. 2018
Resedaceae	Ochradenus baccatus Delile	1	100	100	20				No data on Ochradenus genus
Rhamnaceae	Ziziphus nummularia (Burm.f.) Wight & Arn.	2	50	-	-	53.5% (frequency)	(infected fragments /total fragments)x100	Tarafdar and Rao 1997
						21% (frequency)	(infected fragments /total fragments)x100	Koul 2012
Rutaceae	Citrus spp.	13	0	-	-				Citrus Genus is commonly considered as highly dependent on mycorrhization (wu and Xia. 2006 ; Song et al. 2015)
Sapindaceae	Dodonaea viscosa Jacq.	1	100	-	-	100% (of individuals) / 50-75% (intensity)	Intensity : visual estimation, matrix index	Koske et al. 1992
						Mycorrhized		Li et al. 2004
						99% (root lenght colonization)	No method described	Rahsid et al. 1997
						Not Mycorrhized		Muthukumar and Udaiyan 2000
Solanaceae	Lycium shawii Roem. & Schult.	4	0	-	-	50.8 % (frequency)	(infected fragments/total fragments)x100	Alrajhei et al. 2022
Solanaceae	Withania somnifera (L.) Dun.	3	33	100	55	58% (frequency)	slide method Giovannettiand Mosse 1980	Singh et al.2011
						92.5% (frequency max)	Giovannetti and Mosse 1980	Kumbhar et al. 2015
						40% (frequency)	(infected fragments /total fragments)x100	Koul 2012
Solanaceae	Solanum villosum Mill.	1	0	-	-	Solanum nigrum: 22.2 % (root lenght colonization) / 2.22 %(intensity)	Plenchette and Morel 1996	Sankar et al. 2014	Solanum villosum is a subspecies of solanum nigrum
						Solanum nigrum : 61% (frequency)	(infected fragments /total fragments)x100	Koul et al. 2012
						Solanum nigrum : Not mycorrhized		Muthukumar and Udaiyan 2000
						Solanum nigrum : Not mycorrhized		Muthukumar et al. 2006
Tamaricaceae	Tamarix nilotica (Ehrenb.) Bunge	1	0	-	-	0.17	Brundrett 1996	El-Zayat. 2007
Urticaceae	Forsskaolea tenacissima L.	1	100	50	0.7				No data on the genus Forsskaolea
Zygophyllaceae	Zygophyllum bruguieri (DC.) Christenh. & Byng	2	0	-	-	Fagonia indica : 32%	(infected fragments /total fragments)x100	Alrajhei et al. 2022	No data found on F. bruguieri

## Sheet: References 
Plants
Abdedaiem R, Rejili M, Mahdhi M, et al (2020) Soil Properties Shape Species Diversity and Community Composition of Native Arbuscular Mycorrhizal Fungi in Retama raetam Roots Growing on Arid Ecosystems of Tunisia. International Journal of Agriculture & Biology 23:. https://doi.org/10.17957/IJAB/15.1307
Abdelmoneim TS, Moussa TAA, Almaghrabi OA (2014) Survey of Indigenous Arbuscular Mycorrhizal Fungi under Ecosystem of Saudi Arabia. Journal of Pure and Applied Microbiology Vol. 8(6):4525–4532
Agwa HE, Al-Sodany YM (2003) Arbuscular Mycorrhizal Fungi (Glomales) in Egypt. Egyptian Journal of Biology Vol. 5:pp 19-26
Akachoud O, Bouamama H, Facon N, et al (2022) Mycorrhizal Inoculation Improves the Quality and Productivity of Essential Oil Distilled from Three Aromatic and Medicinal Plants: Thymus satureioides, Thymus pallidus, and Lavandula dentata. Agronomy 12:2223. https://doi.org/10.3390/agronomy12092223
Albaqami SF, Sohaibani AS, Kasi M (2018) Arbuscular Mycorrhizal Fungi Diversity in Two Different Regions in Saudi Arabia. IntJCurrMicrobiolAppSci 7:2492–2510. https://doi.org/10.20546/ijcmas.2018.704.286
Alrajhei K, Saleh I, Abu-Dieyeh MH (2022) Biodiversity of arbuscular mycorrhizal fungi in plant roots and rhizosphere soil from different arid land environment of Qatar. Plant Direct 6:e369. https://doi.org/10.1002/pld3.369
AlZain MN, AlAtar AA, Alqarawi AA, et al (2020) The Influence of Mycorrhizal Fungi on the Accumulation of Sennosides A and B in Senna alexandrina and Senna italica. Separations 7:65. https://doi.org/10.3390/separations7040065
Armada E, Probanza A, Roldán A, Azcón R (2016) Native plant growth promoting bacteria Bacillus thuringiensis and mixed or individual mycorrhizal species improved drought tolerance and oxidative metabolism in Lavandula dentata plants. Journal of Plant Physiology 192:1–12. https://doi.org/10.1016/j.jplph.2015.11.007
Asghari HR, Cavagnaro TR (2010) Mycorrhizal response of halophytes to plant growth in non-saline soil conditions. Brisbane, Australia, pp 36–37
Barni E, Siniscalco C (2000) Vegetation dynamics and arbuscular mycorrhiza in old-field successions of the western Italian Alps. Mycorrhiza 10:63–72. https://doi.org/10.1007/s005720000059
Barroetaveña C, Gisler S, Luoma D, Meinke R (1998) Mycorrhizal status of the endangered species Astragalus applegatei Peck as determined from a soil bioassay. Mycorrhiza 8:117–119. https://doi.org/10.1007/s005720050222
Birhane E, Gebregergs T, Hailemariam M, et al (2021) Root Colonization and Spore Abundance of Arbuscular Mycorrhizal Fungi Along Altitudinal Gradients in Fragmented Church Natural Forest Remnants in Northern Ethiopia. Microb Ecol 82:233–242. https://doi.org/10.1007/s00248-021-01744-5
Birhane E, Gebremedihin KM, Tadesse T, et al (2017) Exclosures restored the density and root colonization of arbuscular mycorrhizal fungi in Tigray, Northern Ethiopia. Ecol Process 6:33. https://doi.org/10.1186/s13717-017-0101-9
Blanke V, Wagner M, Renker C, et al (2011) Arbuscular mycorrhizas in phosphate-polluted soil: interrelations between root colonization and nitrogen. Plant Soil 343:379–392. https://doi.org/10.1007/s11104-011-0727-9
Bouamri R, Dalpe Y, Serrhini MM (2014) Effect of Seasonal Variation on Arbuscular Mycorrhizal Fungi Associated with Date Palm. Emirates Journal of Food and Agriculture 977–986. https://doi.org/10.9755/ejfa.v26i11.18985
Bouamri R, Dalpé Y, Serrhini MN, Bennani A (2006) Arbuscular mycorrhizal fungi species associated with rhizosphere of Phoenix dactylifera L. in Morocco. African Journal of Biotechnology 5:510–516. https://doi.org/10.4314/ajb.v5i6
Bouskout M, Bourhia M, Al Feddy MN, et al (2022) Mycorrhizal Fungi Inoculation Improves Capparis spinosa’s Yield, Nutrient Uptake and Photosynthetic Efficiency under Water Deficit. Agronomy 12:149. https://doi.org/10.3390/agronomy12010149
Chaudhry MS, Batool Z, Khan AG (2005) Preliminary assessment of plant community structure and arbuscular mycorrhizas in rangeland habitats of Cholistan desert, Pakistan. Mycorrhiza 15:606–611. https://doi.org/10.1007/s00572-005-0002-0
Chaudhry MS, Rahman SU, Ismaiel MS, et al (2009) Coexistence of arbuscular mycorrhizae and dark septate endophytic fungi in an undisturbed and a disturbed site of an arid ecosystem. Symbiosis 49:19–28. https://doi.org/10.1007/s13199-009-0010-5
Dutta S (2016) Survey Of Vesicular Arbusclar Mycorrhizal Colonization Status And Occurrence Of Dark Septate Endophytes Within The Roots Of Some Common Cultivated Crop Plants And Wild Plants Of Poaceae, At Burdwan, West Bengal. 5:4402–4414
El-Zayat SA, Abdelmoneim TS (2007) Association of arbuscular mycorrhizal fungi in southern eastern desert (Wadi Allaqi, biosphere reserve) Aswan, Egypt. El-Minia Science Bulletin 18:158–182
Eriksen M, Bjureke KE, Dhillion SS (2002) Mycorrhizal plants of traditionally managed boreal grasslands in Norway. Mycorrhiza 12:117–123. https://doi.org/10.1007/s00572-002-0165-x
Ghosh S, Kuila D (2015) A Comparison of Arbuscular Mycorrhizal colonization and spore diversity in vegetation of Fly Ash deposited area of Kolaghat Thermal Power Station and adjacent normal soil vegetation
Hajiboland R (2013) Role of Arbuscular Mycorrhiza in Amelioration of Salinity. In: Ahmad P, Azooz MM, Prasad MNV (eds) Salt Stress in Plants. Springer New York, New York, NY, pp 301–354
Jaiti F, Meddich A, Hadrami IE (2007) Effectiveness of arbuscular mycorrhizal fungi in the protection of date palm (Phoenix dactylifera L.) against bayoud disease. Physiological and Molecular Plant Pathology 71:166–173. https://doi.org/10.1016/j.pmpp.2008.01.002
Javaid A, Bajwa R, Tasneem Z, Nasim G (1996) Allelopathy and VA mycorrhiza. II: Effect of allelopathic exudates of Dicanthium annulatum (Forssk.) Stapf. on VA mycorrhizae of associated perennial and annual winter weeds. Pakistan Journal of Phytopathology 8:103–106
Jmal Z, Labidi S, Dalpe Y, et al (2015) Diversité de champignons mycorhiziens arbusculaires d’un bas fond halomorphe en Tunisie. Journal of New Sciences 18:648–657
Kasowska D (2002) Mycorrhizal status of plants in two successional stages on spoil heaps from fireloam mining in Lower Silesia (SW Poland). Acta Societatis Botanicorum Poloniae 71:155–161. https://doi.org/10.5586/asbp.2002.018
Koske RE, Gemma JN (1990) Va Mycorrhizae in Strand Vegetation of Hawaii: Evidence for Long-Distance Codispersal of Plants and Fungi. American Journal of Botany 77:466–474. https://doi.org/10.1002/j.1537-2197.1990.tb13577.x
Koske RE, Gemma JN, Flynn T (1992) Mycorrhizae in Hawaiian Angiosperms: A Survey with Implications for the Origin of the Native Flora. American Journal of Botany 79:853–862. https://doi.org/10.1002/j.1537-2197.1992.tb13666.x
Koul KK, Agarwal S, Lone R (2012) Diversity of Arbuscular Mycorrhizal Fungi Associated With the Medicinal Plants from Gwalior-Chambal Region of Madhya Pradesh-India. Environ Sci
Kumbhar VR, Bansode SA, Telmore KM, Bhale UN (2015) Original Article Biomass Productivity and Arbuscular Mycorrhizal Fungal (AMF) Association of Ashwagandha (Withania somnifera L.)
Li T, Li J, Zhao Z (2004) Arbuscular mycorrhizas in a valley-type savanna in southwest China. Mycorrhiza 14:323–327. https://doi.org/10.1007/s00572-003-0277-y
Marthur N, Bohra S, Singh J, Vyas A (2007) Arbuscular Mycorrhizal Status of Medicinal Halophytes in Saline Areas of Indian Thar Desert. International J of Soil Science 2:119–127. https://doi.org/10.3923/ijss.2007.119.127
Moustafa A-WF, Ibrahim ME, Mansour MAI (2010) Endomycorrhizal Fungi Of Arid And Semiarid Areas Of North-Sinai, Egypt. Assiut University Journal of Botany 39:101–117
Muthukumar T, Senthilkumar M, Rajangam M, Udaiyan K (2006) Arbuscular mycorrhizal morphology and dark septate fungal associations in medicinal and aromatic plants of Western Ghats, Southern India. Mycorrhiza 17:11–24. https://doi.org/10.1007/s00572-006-0077-2
Muthukumar T, Udaiyan K (2000) Arbuscular mycorrhizas of plants growing in the Western Ghats region, Southern India. Mycorrhiza 9:297–313. https://doi.org/10.1007/s005720050274
Orłowska E, Zubek Sz, Jurkiewicz A, et al (2002) Influence of restoration on arbuscular mycorrhiza of Biscutella laevigata L. (Brassicaceae) and Plantago lanceolata L. (Plantaginaceae) from calamine spoil mounds. Mycorrhiza 12:153–159. https://doi.org/10.1007/s00572-001-0155-4
Ouahmane L, Duponnois R, Hafidi M, et al (2006) Some Mediterranean plant species (Lavandula spp. and Thymus satureioides) act as potential ‘plant nurses’ for the early growth of Cupressus atlantica. Plant Ecol 185:123–134. https://doi.org/10.1007/s11258-005-9089-9
Pawlowska TE, Błaszkowski J, Rühling Å (1997) The mycorrhizal status of plants colonizing a calamine spoil mound in southern Poland. Mycorrhiza 6:499–505. https://doi.org/10.1007/s005720050154
Rashid A, Ahmed T, Ayub N, Khan AG (1997) Effect of forest fire on number, viability and post-fire re-establishment of arbuscular mycorrhizae. Mycorrhiza 7:217–220. https://doi.org/10.1007/s005720050183
Rozema J, Arp W, van Diggelen J, et al (1986) Occurrence and Ecological Significance of Vesicular Arbuscular Mycorrhiza in the Salt Marsh Environment. Acta Botanica Neerlandica 35:457–467. https://doi.org/10.1111/j.1438-8677.1986.tb00485.x
Sankar H, Medhanie G, Kanagaraj M, Vijay Kumar D (2014) Arbuscular mycorrhizal fungi colonizing the plant communities in Eritrea, northeast Africa. Applied Ecology and Environmental Research 13:193–203. https://doi.org/10.15666/aeer/1301_193203
Santhoshkumar, S, N N, K S (2018) STUDIES ON THE ARBUSCULAR MYCORRHIZAL FUNGAL BIODIVERSITY IN THE PLANT SPECIES OF KONDRANGHI HILLS, DINDUGUL DISTRICT, TAMIL NADU, INDIA. krj 5:34–40. https://doi.org/10.26524/krj268
Santhoshkumar, S, N N, S S (2019) Studies On The Arbuscular Mycorrhizal Fungal Association In The Plant Species Of Ponnuthu Hills, Western Ghats Coimbatore District, Tamilnadu. krj 6:13–19. https://doi.org/10.26524/krj296
Selim K (2011) Biodiversity and antimicrobial activity of endophytes associated with Egyptian medicinal plants. Mycosphere 2:669–678. https://doi.org/10.5943/mycosphere/2/6/7
Shafiq M, Nasim F, Khan A (2006) Mycorrhizas in the Perennial Grasses of Cholistan Desert, Pakistan. International Journal of Botany 2:. https://doi.org/10.3923/ijb.2006.210.218
Singh M, Singh P, Vyas D (2011) Mycorrhization in medicinal plants. mycorrhiza news 23:14–21
Suliman KH, Barakah FN, Assaeed AM (2017) Structural colonization of Arbuscular mycorrhizal fungi in three acacia species of different sizes in Riyadh, Saudi Arabia. Int J Biosci 10:308–318. https://doi.org/10.12692/ijb/10.5.308-318
Tabassum Yaseen FM, Gul R, Kushnood Ur Rehman NA (2020) 41. Investigating arbuscular mycorrhizal fungal infection in medicinal plant roots in different localities of tehsil Shabqadar, district Charsadda, and Khyber Pakhtunkhwa Province, Pakistan. Pure and Applied Biology (PAB) 9:427–435
Taheri AE, Fahimi H, Balali GR (2009) Farming Increases the Spore Population of AM Fungi in Central Deserts of Iran
Tarafdar JC, Rao AV (1997) Mycorrhizal colonization and nutrient concentration of naturally grown plants on gypsum mine spoils in India. Agriculture, Ecosystems & Environment 61:13–18. https://doi.org/10.1016/S0167-8809(96)01089-4
Treu R, Laursen GA, Stephenson SL, et al (1995) Mycorrhizae from Denali National Park and Preserve, Alaska. Mycorrhiza 6:21–29. https://doi.org/10.1007/s005720050101
Uhlmann E, Görke C, Petersen A, Oberwinkler F (2004) Arbuscular mycorrhizae from semiarid regions of Namibia. Can J Bot 82:645–653. https://doi.org/10.1139/b04-039
Wang B, Qiu Y-L (2006) Phylogenetic distribution and evolution of mycorrhizas in land plants. Mycorrhiza 16:299–363. https://doi.org/10.1007/s00572-005-0033-6
Yaseen T, Khan Y, Rahim F, et al (2021) 56. Arbuscular Mycorrhizal Fungi spores diversity and AMF infection in somemedicinal plants of District Charsadda KPK. Pure and Applied Biology (PAB) 5:1176–1182
Estimation method
Biermann B, Linderman RG (1981) Quantifying Vesicular-Arbuscular Mycorrhizae: A Proposed Method Towards Standardization. The New Phytologist 87:63–67
Brundrett M, Bougher N, Dell B, et al (1996) Working with Mycorrhizas in Forestry and Agriculture
Giovannetti M, Mosse B (1980) An Evaluation of Techniques for Measuring Vesicular Arbuscular Mycorrhizal Infection in Roots. New Phytologist 84:489–500. https://doi.org/10.1111/j.1469-8137.1980.tb04556.x
McGONIGLE TP, Miller MH, Evans DG, et al (1990) A new method which gives an objective measure of colonization of roots by vesicular—arbuscular mycorrhizal fungi. New Phytologist 115:495–501. https://doi.org/10.1111/j.1469-8137.1990.tb00476.x
Phillips JM, Hayman DS (1970) Improved procedures for clearing roots and staining parasitic and vesicular-arbuscular mycorrhizal fungi for rapid assessment of infection. Transactions of the British Mycological Society 55:158-IN18. https://doi.org/10.1016/S0007-1536(70)80110-3
Plenchette C, Morel C (1996) External phosphorus requirement of mycorrhizal and non-mycorrhizal barley and soybean plants. Biol Fert Soils 21:303–308. https://doi.org/10.1007/BF00334907
Trouvelot A, Kough JL, Gianinazzi-Pearson V (1986) Estimation of vesicular arbuscular mycorrhizal infection levels. Research for methods having a functional significance. Physiological and genetical aspects of mycorrhizae INRA, Paris:217–22

## Sheet: Legend
Table S2 Comparison of mycorrhizal observation in plant spceies collected in AlUla with scientific literature on these species or, when not available, plants of the same genus. Frequency and Intensity of mycorrhization were searched in scientific literature on these plants. Several methods exist to measure the Frequency and Intensity of mycorrhization, method used in the articles are written in t…
